# Supplementary material
Source: publisher site journal article supplement (https://www.dovepress.com/article/279154)
Supplement: Supplementary file 1 [file get_supplementary_file.php]

**Pharmacy technicians' perception about symptoms and concerns of older patients visiting pharmacies – a cross sectional study**

Homann K, Bertsche T, Schiek S

Drug Safety Center, University Hospital Leipzig and Leipzig University and Dept. of Clinical Pharmacy, Institute of Pharmacy, Faculty of Medicine, Leipzig University, Leipzig, Germany;

E-mail to klinische.pharmazie@uni-leipzig.de

**Supplement 1**

**Translated questions of the original German questionnaire**

The original questionnaire was conducted in German and can be found in Supplement 2. For a better understanding of the survey we translated the original questionnaire. Note that the following translation is not a professionally validated translation.

*Please refer your answers to older patients in your daily pharmacy routine, who are >70 years and with multimorbidity!*

**What is your spontaneous answer?**

| Symptoms<br>(independent of their cause) | 1a) How many of your older patients suffer from the following symptoms? |                          |                          |                          |                          | 1b) In your opinion, how much do the following symptoms affect the respective older patients in general? |                          |                          |                          | 1c) In how many of your older patients in the community pharmacy do you recognize a need for more support in everyday life with regard to the following symptoms? |                          |                          |                          |                          |
|------------------------------------------|-------------------------------------------------------------------------|--------------------------|--------------------------|--------------------------|--------------------------|----------------------------------------------------------------------------------------------------------|--------------------------|--------------------------|--------------------------|-------------------------------------------------------------------------------------------------------------------------------------------------------------------|--------------------------|--------------------------|--------------------------|--------------------------|
|                                          | None                                                                    | A few                    | Many                     | Most                     | All                      | Severe                                                                                                   | Moderate                 | Mild                     | No                       | None                                                                                                                                                              | A few                    | Many                     | Most                     | All                      |
| Skin problems                            | <input type="checkbox"/>                                                | <input type="checkbox"/> | <input type="checkbox"/> | <input type="checkbox"/> | <input type="checkbox"/> | <input type="checkbox"/>                                                                                 | <input type="checkbox"/> | <input type="checkbox"/> | <input type="checkbox"/> | <input type="checkbox"/>                                                                                                                                          | <input type="checkbox"/> | <input type="checkbox"/> | <input type="checkbox"/> | <input type="checkbox"/> |
| Restricted mobility                      | <input type="checkbox"/>                                                | <input type="checkbox"/> | <input type="checkbox"/> | <input type="checkbox"/> | <input type="checkbox"/> | <input type="checkbox"/>                                                                                 | <input type="checkbox"/> | <input type="checkbox"/> | <input type="checkbox"/> | <input type="checkbox"/>                                                                                                                                          | <input type="checkbox"/> | <input type="checkbox"/> | <input type="checkbox"/> | <input type="checkbox"/> |
| Eye disorders                            | <input type="checkbox"/>                                                | <input type="checkbox"/> | <input type="checkbox"/> | <input type="checkbox"/> | <input type="checkbox"/> | <input type="checkbox"/>                                                                                 | <input type="checkbox"/> | <input type="checkbox"/> | <input type="checkbox"/> | <input type="checkbox"/>                                                                                                                                          | <input type="checkbox"/> | <input type="checkbox"/> | <input type="checkbox"/> | <input type="checkbox"/> |
| Dyspnoea                                 | <input type="checkbox"/>                                                | <input type="checkbox"/> | <input type="checkbox"/> | <input type="checkbox"/> | <input type="checkbox"/> | <input type="checkbox"/>                                                                                 | <input type="checkbox"/> | <input type="checkbox"/> | <input type="checkbox"/> | <input type="checkbox"/>                                                                                                                                          | <input type="checkbox"/> | <input type="checkbox"/> | <input type="checkbox"/> | <input type="checkbox"/> |
| Dizziness                                | <input type="checkbox"/>                                                | <input type="checkbox"/> | <input type="checkbox"/> | <input type="checkbox"/> | <input type="checkbox"/> | <input type="checkbox"/>                                                                                 | <input type="checkbox"/> | <input type="checkbox"/> | <input type="checkbox"/> | <input type="checkbox"/>                                                                                                                                          | <input type="checkbox"/> | <input type="checkbox"/> | <input type="checkbox"/> | <input type="checkbox"/> |
| Cough                                    | <input type="checkbox"/>                                                | <input type="checkbox"/> | <input type="checkbox"/> | <input type="checkbox"/> | <input type="checkbox"/> | <input type="checkbox"/>                                                                                 | <input type="checkbox"/> | <input type="checkbox"/> | <input type="checkbox"/> | <input type="checkbox"/>                                                                                                                                          | <input type="checkbox"/> | <input type="checkbox"/> | <input type="checkbox"/> | <input type="checkbox"/> |
| Dysphagia                                | <input type="checkbox"/>                                                | <input type="checkbox"/> | <input type="checkbox"/> | <input type="checkbox"/> | <input type="checkbox"/> | <input type="checkbox"/>                                                                                 | <input type="checkbox"/> | <input type="checkbox"/> | <input type="checkbox"/> | <input type="checkbox"/>                                                                                                                                          | <input type="checkbox"/> | <input type="checkbox"/> | <input type="checkbox"/> | <input type="checkbox"/> |
| Dry mouth                                | <input type="checkbox"/>                                                | <input type="checkbox"/> | <input type="checkbox"/> | <input type="checkbox"/> | <input type="checkbox"/> | <input type="checkbox"/>                                                                                 | <input type="checkbox"/> | <input type="checkbox"/> | <input type="checkbox"/> | <input type="checkbox"/>                                                                                                                                          | <input type="checkbox"/> | <input type="checkbox"/> | <input type="checkbox"/> | <input type="checkbox"/> |
| Nausea and vomiting                      | <input type="checkbox"/>                                                | <input type="checkbox"/> | <input type="checkbox"/> | <input type="checkbox"/> | <input type="checkbox"/> | <input type="checkbox"/>                                                                                 | <input type="checkbox"/> | <input type="checkbox"/> | <input type="checkbox"/> | <input type="checkbox"/>                                                                                                                                          | <input type="checkbox"/> | <input type="checkbox"/> | <input type="checkbox"/> | <input type="checkbox"/> |
| Constipation                             | <input type="checkbox"/>                                                | <input type="checkbox"/> | <input type="checkbox"/> | <input type="checkbox"/> | <input type="checkbox"/> | <input type="checkbox"/>                                                                                 | <input type="checkbox"/> | <input type="checkbox"/> | <input type="checkbox"/> | <input type="checkbox"/>                                                                                                                                          | <input type="checkbox"/> | <input type="checkbox"/> | <input type="checkbox"/> | <input type="checkbox"/> |
| Urinary incontinence                     | <input type="checkbox"/>                                                | <input type="checkbox"/> | <input type="checkbox"/> | <input type="checkbox"/> | <input type="checkbox"/> | <input type="checkbox"/>                                                                                 | <input type="checkbox"/> | <input type="checkbox"/> | <input type="checkbox"/> | <input type="checkbox"/>                                                                                                                                          | <input type="checkbox"/> | <input type="checkbox"/> | <input type="checkbox"/> | <input type="checkbox"/> |
| Insomnia                                 | <input type="checkbox"/>                                                | <input type="checkbox"/> | <input type="checkbox"/> | <input type="checkbox"/> | <input type="checkbox"/> | <input type="checkbox"/>                                                                                 | <input type="checkbox"/> | <input type="checkbox"/> | <input type="checkbox"/> | <input type="checkbox"/>                                                                                                                                          | <input type="checkbox"/> | <input type="checkbox"/> | <input type="checkbox"/> | <input type="checkbox"/> |
| Memory impairment                        | <input type="checkbox"/>                                                | <input type="checkbox"/> | <input type="checkbox"/> | <input type="checkbox"/> | <input type="checkbox"/> | <input type="checkbox"/>                                                                                 | <input type="checkbox"/> | <input type="checkbox"/> | <input type="checkbox"/> | <input type="checkbox"/>                                                                                                                                          | <input type="checkbox"/> | <input type="checkbox"/> | <input type="checkbox"/> | <input type="checkbox"/> |
| Unhappiness/ Depression                  | <input type="checkbox"/>                                                | <input type="checkbox"/> | <input type="checkbox"/> | <input type="checkbox"/> | <input type="checkbox"/> | <input type="checkbox"/>                                                                                 | <input type="checkbox"/> | <input type="checkbox"/> | <input type="checkbox"/> | <input type="checkbox"/>                                                                                                                                          | <input type="checkbox"/> | <input type="checkbox"/> | <input type="checkbox"/> | <input type="checkbox"/> |
| Confusion                                | <input type="checkbox"/>                                                | <input type="checkbox"/> | <input type="checkbox"/> | <input type="checkbox"/> | <input type="checkbox"/> | <input type="checkbox"/>                                                                                 | <input type="checkbox"/> | <input type="checkbox"/> | <input type="checkbox"/> | <input type="checkbox"/>                                                                                                                                          | <input type="checkbox"/> | <input type="checkbox"/> | <input type="checkbox"/> | <input type="checkbox"/> |
| Pain                                     | <input type="checkbox"/>                                                | <input type="checkbox"/> | <input type="checkbox"/> | <input type="checkbox"/> | <input type="checkbox"/> | <input type="checkbox"/>                                                                                 | <input type="checkbox"/> | <input type="checkbox"/> | <input type="checkbox"/> | <input type="checkbox"/>                                                                                                                                          | <input type="checkbox"/> | <input type="checkbox"/> | <input type="checkbox"/> | <input type="checkbox"/> |
| Hematoma                                 | <input type="checkbox"/>                                                | <input type="checkbox"/> | <input type="checkbox"/> | <input type="checkbox"/> | <input type="checkbox"/> | <input type="checkbox"/>                                                                                 | <input type="checkbox"/> | <input type="checkbox"/> | <input type="checkbox"/> | <input type="checkbox"/>                                                                                                                                          | <input type="checkbox"/> | <input type="checkbox"/> | <input type="checkbox"/> | <input type="checkbox"/> |
| Edema                                    | <input type="checkbox"/>                                                | <input type="checkbox"/> | <input type="checkbox"/> | <input type="checkbox"/> | <input type="checkbox"/> | <input type="checkbox"/>                                                                                 | <input type="checkbox"/> | <input type="checkbox"/> | <input type="checkbox"/> | <input type="checkbox"/>                                                                                                                                          | <input type="checkbox"/> | <input type="checkbox"/> | <input type="checkbox"/> | <input type="checkbox"/> |
| Falls                                    | <input type="checkbox"/>                                                | <input type="checkbox"/> | <input type="checkbox"/> | <input type="checkbox"/> | <input type="checkbox"/> | <input type="checkbox"/>                                                                                 | <input type="checkbox"/> | <input type="checkbox"/> | <input type="checkbox"/> | <input type="checkbox"/>                                                                                                                                          | <input type="checkbox"/> | <input type="checkbox"/> | <input type="checkbox"/> | <input type="checkbox"/> |
| Appetite and weight loss                 | <input type="checkbox"/>                                                | <input type="checkbox"/> | <input type="checkbox"/> | <input type="checkbox"/> | <input type="checkbox"/> | <input type="checkbox"/>                                                                                 | <input type="checkbox"/> | <input type="checkbox"/> | <input type="checkbox"/> | <input type="checkbox"/>                                                                                                                                          | <input type="checkbox"/> | <input type="checkbox"/> | <input type="checkbox"/> | <input type="checkbox"/> |



# Pharmacy technicians' perception about symptoms and concerns of older patients visiting pharmacies – a cross sectional study

Homann K, Bertsche T, Schiek S

Drug Safety Center, University Hospital Leipzig and Leipzig University and Dept. of Clinical Pharmacy, Institute of Pharmacy, Faculty of Medicine, Leipzig University, Leipzig, Germany;

E-mail to klinische.pharmazie@uni-leipzig.de

**3. What reasons can you spontaneously think of why older patients do not receive sufficient support for the above-mentioned symptoms and concerns?**

**4. Please rank the following aspects according to their importance and the extent they occur in your daily pharmacy routine while counselling older patients.**

| Importance<br>5= most important<br>1= least important | Extent<br>5= most extensive<br>1= rarest | Aspects in counselling older patients                                                                                          |
|-------------------------------------------------------|------------------------------------------|--------------------------------------------------------------------------------------------------------------------------------|
|                                                       |                                          | Counselling on non-drug therapy                                                                                                |
|                                                       |                                          | Support and assistance for everyday life                                                                                       |
|                                                       |                                          | Logistics and research on the availability of drugs                                                                            |
|                                                       |                                          | Organizational aspects regarding regulatory frameworks (medicines discount contracts, authorization by health insurance, etc.) |
|                                                       |                                          | Counselling on drug therapy                                                                                                    |

**5. Would you like your pharmacy to have more cooperation with other health care professions in the care of older patients?**

- Yes       No → Go to question number 7

**6. With which of the following professional groups would you like the pharmacy to cooperate more closely in the care of older patients?**

(multiple selection possible)

- General practitioner       Palliative physician       Social worker  
 Volunteers                       Pastoral care                       Nursing service  
 Nutrition consultation       Other: \_\_\_\_\_

Finally, we would like to ask you for sociodemographic data:

**7. Which professional group do you belong to?**

- Pharmacy technicians       Pharmacist       PKA       Other: \_\_\_\_\_

**8. How many hours per week do you spend working in a community pharmacy?**  
 Hours / Week

**9. What percentage of your working time do you spend counselling older patients on average?**

%

**10. With which institution of geriatric or palliative care does your pharmacy already cooperate?**

- Nursing home       Palliative Network       Hospice  
 Specialized Outpatient Palliative Care       Senior Citizen Network  
 Other: \_\_\_\_\_

**11. Where is your community pharmacy localized?**

- Big city (number of inhabitants > 100,000)  
 Medium-size city (number of inhabitants 20,000 – 100,000)  
 Small town (number of inhabitants 5.000 – 20.000)  
 Rural community (number of inhabitants < 5.000)

**12. In total, for how many years have you worked in a community pharmacy?**

Years

**13. How old are you?**

Years

**14. Which gender do you feel you belong to?**

- Male       Female       Diverse

# Pharmacy technicians' perception about symptoms and concerns of older patients visiting pharmacies – a cross sectional study

Homann K, Bertsche T, Schiek S

Drug Safety Center, University Hospital Leipzig and Leipzig University and Dept. of Clinical Pharmacy, Institute of Pharmacy, Faculty of Medicine, Leipzig University, Leipzig, Germany;  
E-mail to klinische.pharmazie@uni-leipzig.de

## Supplement 2 Original questionnaire in German

Bitte denken Sie bei der Beantwortung der Fragen an geriatrische Patienten in Ihrem Apothekenalltag! ( $\approx >70$  Jahre und Multimorbidität)

### Was würden Sie spontan schätzen?

| Symptome<br>(unabhängig von deren<br>Ursache) | 1a) Wie viele Ihrer <u>geriatrischen Patienten</u><br>haben folgende Symptome? |                          |                          |                          |                          | 1b) Wie wirken sich Ihrer Meinung nach folgende<br>Symptome meistens bei <u>betroffenen geriatrischen</u><br><u>Patienten im Alltag</u> aus? |                                    |                                   |                                   | 1c) Bei <u>wie vielen</u> Ihrer <u>geriatrischen Patienten</u><br>sehen Sie in der Apotheke, dass diese bzgl. der<br>folgenden Symptome <u>im Alltag mehr</u><br><u>Unterstützung</u> bräuchten? |                          |                          |                          |                          |
|-----------------------------------------------|--------------------------------------------------------------------------------|--------------------------|--------------------------|--------------------------|--------------------------|----------------------------------------------------------------------------------------------------------------------------------------------|------------------------------------|-----------------------------------|-----------------------------------|--------------------------------------------------------------------------------------------------------------------------------------------------------------------------------------------------|--------------------------|--------------------------|--------------------------|--------------------------|
|                                               | Keiner                                                                         | Nur wenige               | Viele                    | Die meisten              | Alle                     | <u>Keine</u><br>Beeinträchtigung                                                                                                             | <u>Leichte</u><br>Beeinträchtigung | <u>Mäßige</u><br>Beeinträchtigung | <u>Starke</u><br>Beeinträchtigung | Keiner                                                                                                                                                                                           | Nur wenige               | Viele                    | Die meisten              | Alle                     |
| Hautprobleme                                  | <input type="checkbox"/>                                                       | <input type="checkbox"/> | <input type="checkbox"/> | <input type="checkbox"/> | <input type="checkbox"/> | <input type="checkbox"/>                                                                                                                     | <input type="checkbox"/>           | <input type="checkbox"/>          | <input type="checkbox"/>          | <input type="checkbox"/>                                                                                                                                                                         | <input type="checkbox"/> | <input type="checkbox"/> | <input type="checkbox"/> | <input type="checkbox"/> |
| Eingeschränkte<br>Bewegungsmöglichkeiten      | <input type="checkbox"/>                                                       | <input type="checkbox"/> | <input type="checkbox"/> | <input type="checkbox"/> | <input type="checkbox"/> | <input type="checkbox"/>                                                                                                                     | <input type="checkbox"/>           | <input type="checkbox"/>          | <input type="checkbox"/>          | <input type="checkbox"/>                                                                                                                                                                         | <input type="checkbox"/> | <input type="checkbox"/> | <input type="checkbox"/> | <input type="checkbox"/> |
| Augenprobleme                                 | <input type="checkbox"/>                                                       | <input type="checkbox"/> | <input type="checkbox"/> | <input type="checkbox"/> | <input type="checkbox"/> | <input type="checkbox"/>                                                                                                                     | <input type="checkbox"/>           | <input type="checkbox"/>          | <input type="checkbox"/>          | <input type="checkbox"/>                                                                                                                                                                         | <input type="checkbox"/> | <input type="checkbox"/> | <input type="checkbox"/> | <input type="checkbox"/> |
| Atemnot                                       | <input type="checkbox"/>                                                       | <input type="checkbox"/> | <input type="checkbox"/> | <input type="checkbox"/> | <input type="checkbox"/> | <input type="checkbox"/>                                                                                                                     | <input type="checkbox"/>           | <input type="checkbox"/>          | <input type="checkbox"/>          | <input type="checkbox"/>                                                                                                                                                                         | <input type="checkbox"/> | <input type="checkbox"/> | <input type="checkbox"/> | <input type="checkbox"/> |
| Schwindel                                     | <input type="checkbox"/>                                                       | <input type="checkbox"/> | <input type="checkbox"/> | <input type="checkbox"/> | <input type="checkbox"/> | <input type="checkbox"/>                                                                                                                     | <input type="checkbox"/>           | <input type="checkbox"/>          | <input type="checkbox"/>          | <input type="checkbox"/>                                                                                                                                                                         | <input type="checkbox"/> | <input type="checkbox"/> | <input type="checkbox"/> | <input type="checkbox"/> |
| Husten                                        | <input type="checkbox"/>                                                       | <input type="checkbox"/> | <input type="checkbox"/> | <input type="checkbox"/> | <input type="checkbox"/> | <input type="checkbox"/>                                                                                                                     | <input type="checkbox"/>           | <input type="checkbox"/>          | <input type="checkbox"/>          | <input type="checkbox"/>                                                                                                                                                                         | <input type="checkbox"/> | <input type="checkbox"/> | <input type="checkbox"/> | <input type="checkbox"/> |
| Schluckprobleme                               | <input type="checkbox"/>                                                       | <input type="checkbox"/> | <input type="checkbox"/> | <input type="checkbox"/> | <input type="checkbox"/> | <input type="checkbox"/>                                                                                                                     | <input type="checkbox"/>           | <input type="checkbox"/>          | <input type="checkbox"/>          | <input type="checkbox"/>                                                                                                                                                                         | <input type="checkbox"/> | <input type="checkbox"/> | <input type="checkbox"/> | <input type="checkbox"/> |
| Mundtrockenheit                               | <input type="checkbox"/>                                                       | <input type="checkbox"/> | <input type="checkbox"/> | <input type="checkbox"/> | <input type="checkbox"/> | <input type="checkbox"/>                                                                                                                     | <input type="checkbox"/>           | <input type="checkbox"/>          | <input type="checkbox"/>          | <input type="checkbox"/>                                                                                                                                                                         | <input type="checkbox"/> | <input type="checkbox"/> | <input type="checkbox"/> | <input type="checkbox"/> |
| Übelkeit oder Erbrechen                       | <input type="checkbox"/>                                                       | <input type="checkbox"/> | <input type="checkbox"/> | <input type="checkbox"/> | <input type="checkbox"/> | <input type="checkbox"/>                                                                                                                     | <input type="checkbox"/>           | <input type="checkbox"/>          | <input type="checkbox"/>          | <input type="checkbox"/>                                                                                                                                                                         | <input type="checkbox"/> | <input type="checkbox"/> | <input type="checkbox"/> | <input type="checkbox"/> |
| Verstopfungen                                 | <input type="checkbox"/>                                                       | <input type="checkbox"/> | <input type="checkbox"/> | <input type="checkbox"/> | <input type="checkbox"/> | <input type="checkbox"/>                                                                                                                     | <input type="checkbox"/>           | <input type="checkbox"/>          | <input type="checkbox"/>          | <input type="checkbox"/>                                                                                                                                                                         | <input type="checkbox"/> | <input type="checkbox"/> | <input type="checkbox"/> | <input type="checkbox"/> |
| Inkontinenz                                   | <input type="checkbox"/>                                                       | <input type="checkbox"/> | <input type="checkbox"/> | <input type="checkbox"/> | <input type="checkbox"/> | <input type="checkbox"/>                                                                                                                     | <input type="checkbox"/>           | <input type="checkbox"/>          | <input type="checkbox"/>          | <input type="checkbox"/>                                                                                                                                                                         | <input type="checkbox"/> | <input type="checkbox"/> | <input type="checkbox"/> | <input type="checkbox"/> |
| Schlafprobleme                                | <input type="checkbox"/>                                                       | <input type="checkbox"/> | <input type="checkbox"/> | <input type="checkbox"/> | <input type="checkbox"/> | <input type="checkbox"/>                                                                                                                     | <input type="checkbox"/>           | <input type="checkbox"/>          | <input type="checkbox"/>          | <input type="checkbox"/>                                                                                                                                                                         | <input type="checkbox"/> | <input type="checkbox"/> | <input type="checkbox"/> | <input type="checkbox"/> |
| Gedächtnisprobleme                            | <input type="checkbox"/>                                                       | <input type="checkbox"/> | <input type="checkbox"/> | <input type="checkbox"/> | <input type="checkbox"/> | <input type="checkbox"/>                                                                                                                     | <input type="checkbox"/>           | <input type="checkbox"/>          | <input type="checkbox"/>          | <input type="checkbox"/>                                                                                                                                                                         | <input type="checkbox"/> | <input type="checkbox"/> | <input type="checkbox"/> | <input type="checkbox"/> |
| Traurige Stimmung                             | <input type="checkbox"/>                                                       | <input type="checkbox"/> | <input type="checkbox"/> | <input type="checkbox"/> | <input type="checkbox"/> | <input type="checkbox"/>                                                                                                                     | <input type="checkbox"/>           | <input type="checkbox"/>          | <input type="checkbox"/>          | <input type="checkbox"/>                                                                                                                                                                         | <input type="checkbox"/> | <input type="checkbox"/> | <input type="checkbox"/> | <input type="checkbox"/> |
| Verwirrtheit                                  | <input type="checkbox"/>                                                       | <input type="checkbox"/> | <input type="checkbox"/> | <input type="checkbox"/> | <input type="checkbox"/> | <input type="checkbox"/>                                                                                                                     | <input type="checkbox"/>           | <input type="checkbox"/>          | <input type="checkbox"/>          | <input type="checkbox"/>                                                                                                                                                                         | <input type="checkbox"/> | <input type="checkbox"/> | <input type="checkbox"/> | <input type="checkbox"/> |
| Schmerzen                                     | <input type="checkbox"/>                                                       | <input type="checkbox"/> | <input type="checkbox"/> | <input type="checkbox"/> | <input type="checkbox"/> | <input type="checkbox"/>                                                                                                                     | <input type="checkbox"/>           | <input type="checkbox"/>          | <input type="checkbox"/>          | <input type="checkbox"/>                                                                                                                                                                         | <input type="checkbox"/> | <input type="checkbox"/> | <input type="checkbox"/> | <input type="checkbox"/> |
| Hämatome                                      | <input type="checkbox"/>                                                       | <input type="checkbox"/> | <input type="checkbox"/> | <input type="checkbox"/> | <input type="checkbox"/> | <input type="checkbox"/>                                                                                                                     | <input type="checkbox"/>           | <input type="checkbox"/>          | <input type="checkbox"/>          | <input type="checkbox"/>                                                                                                                                                                         | <input type="checkbox"/> | <input type="checkbox"/> | <input type="checkbox"/> | <input type="checkbox"/> |
| Ödeme                                         | <input type="checkbox"/>                                                       | <input type="checkbox"/> | <input type="checkbox"/> | <input type="checkbox"/> | <input type="checkbox"/> | <input type="checkbox"/>                                                                                                                     | <input type="checkbox"/>           | <input type="checkbox"/>          | <input type="checkbox"/>          | <input type="checkbox"/>                                                                                                                                                                         | <input type="checkbox"/> | <input type="checkbox"/> | <input type="checkbox"/> | <input type="checkbox"/> |
| Stürze                                        | <input type="checkbox"/>                                                       | <input type="checkbox"/> | <input type="checkbox"/> | <input type="checkbox"/> | <input type="checkbox"/> | <input type="checkbox"/>                                                                                                                     | <input type="checkbox"/>           | <input type="checkbox"/>          | <input type="checkbox"/>          | <input type="checkbox"/>                                                                                                                                                                         | <input type="checkbox"/> | <input type="checkbox"/> | <input type="checkbox"/> | <input type="checkbox"/> |
| Appetit- oder<br>Gewichtsverlust              | <input type="checkbox"/>                                                       | <input type="checkbox"/> | <input type="checkbox"/> | <input type="checkbox"/> | <input type="checkbox"/> | <input type="checkbox"/>                                                                                                                     | <input type="checkbox"/>           | <input type="checkbox"/>          | <input type="checkbox"/>          | <input type="checkbox"/>                                                                                                                                                                         | <input type="checkbox"/> | <input type="checkbox"/> | <input type="checkbox"/> | <input type="checkbox"/> |



3. Welche Gründe fallen Ihnen spontan dafür ein, warum geriatrische Patienten im Alltag bisher nicht ausreichend Unterstützung für die oben erwähnten Symptome/ Aspekte erhalten?

4. Ordnen Sie folgende Aspekte nach der Wichtigkeit sowie dem Umfang, den diese in Ihrem Apothekenalltag in Beratungsgesprächen mit geriatrischen Patienten einnehmen.

| Wichtigkeit<br>5= am wichtigsten<br>1= am unwichtigste | Umfang<br>5= am umfangreichste<br>1= am seltensten | Aspekte in Beratungsgesprächen<br>älterer Patienten                                            |
|--------------------------------------------------------|----------------------------------------------------|------------------------------------------------------------------------------------------------|
|                                                        |                                                    | Beratung zur nicht-medikamentösen Therapie                                                     |
|                                                        |                                                    | Unterstützung und Hilfestellung für den Alltag                                                 |
|                                                        |                                                    | Logistik und Recherche zur Verfügbarkeit von Arzneimitteln                                     |
|                                                        |                                                    | Organisatorische Aspekte zu gesetzlichen Rahmenbedingungen (Rabattverträge, Genehmigung, etc.) |
|                                                        |                                                    | Beratung zur medikamentösen Therapie                                                           |

5. Würden Sie sich in der Apotheke mehr Zusammenarbeit mit Ansprechpartnern unterschiedlicher Gesundheitsberufe für die Betreuung älterer Patienten wünschen?

- Ja       Nein → Weiter mit Frage 7

6. Mit welchen der folgenden Berufsgruppen würden Sie sich für die Apotheke eine engere Zusammenarbeit für die Betreuung älterer Patienten wünschen?

(Mehrfachauswahl möglich)

- Hausarzt       Palliativmediziner       Sozialarbeiter  
 Ehrenamtliche       Seelsorger       Pflegedienst  
 Ernährungsberatung       Andere: \_\_\_\_\_

Zum Schluss bitten wir Sie noch um ein paar soziodemographische Daten:

7. Welcher Berufsgruppe gehören Sie an?

- PTA       Apotheker       PKA       Andere: \_\_\_\_\_

8. Wie viele Stunden pro Woche arbeiten Sie in einer öffentlichen Apotheke?

Stunden / Woche

9. Wie viel Prozent Ihrer Arbeitszeit verbringen Sie durchschnittlich mit der Beratung geriatrischer Patienten?

%

10. Mit welchen geriatrischen / palliativen Einrichtungen arbeitet Ihre Apotheke zusammen?

- Pflegeheim       Palliativnetzwerk       Hospiz  
 SAPV –Team       Seniorennetzwerk       Andere: \_\_\_\_\_

11. Wo liegt die öffentliche Apotheke, in der Sie arbeiten?

- Großstadt (ab 100.000 Einwohner)  
 Mittelgroße Stadt (20.000 – 100.000 Einwohner)  
 Kleinstadt (5.000 – 20.000 Einwohner)  
 Landgemeinde (unter 5.000 Einwohner)

12. Wie viele Jahre arbeiten Sie insgesamt schon in einer öffentlichen Apotheke?

Jahre

13. Wie alt sind Sie?

Jahre

14. Welchem Geschlecht fühlen Sie sich zugehörig?

- Männlich       Weiblich       Divers
